# A polyphenol-rich extract of Olive Mill Wastewater Enhances cancer chemotherapy effects, while mitigating cardiac toxicity

Adriana Albini<sup>1,\*</sup>, Marco M. G. Festa<sup>1\*</sup>, Nadja Ring<sup>2\*</sup>, Denisa Baci<sup>1</sup>, Michael Rehman<sup>2</sup>, Giovanna Finzi<sup>3</sup>, Fausto Sessa<sup>3,4</sup>, Serena Zacchigna<sup>2,5</sup>, Antonino Bruno<sup>6+</sup>, and Douglas M. Noonan<sup>7,8+</sup>

<sup>1</sup> Laboratory of Vascular Biology and Angiogenesis, IRCCS MultiMedica, Milan, Italy; [adriana.albini@multimedica.it](mailto:adriana.albini@multimedica.it); [marcomariogiacomo.festa@multimedica.it](mailto:marcomariogiacomo.festa@multimedica.it); [denisa.baci@multimedica.it](mailto:denisa.baci@multimedica.it);

<sup>2</sup> Cardiovascular Biology Laboratory, International Centre for Genetic Engineering and Biotechnology, Trieste, Italy; [zacchign@icgeb.org](mailto:zacchign@icgeb.org); [ring@icgeb.org](mailto:ring@icgeb.org); [michael.rehman@icgeb.org](mailto:michael.rehman@icgeb.org)

<sup>3</sup> Department of Pathology, ASST Settelaghi, Varese, Italy, [giovanna.finzi@asst-settelaghi.it](mailto:giovanna.finzi@asst-settelaghi.it)

<sup>4</sup> Department of Medicine and Surgery, University of Insubria, Varese, Italy [fausto.sessa@uninsubria.it](mailto:fausto.sessa@uninsubria.it)

<sup>5</sup> Department of Medicine, Surgery and Health Science, University of Trieste, Trieste, Italy

<sup>6</sup> Laboratory of Immunology, Unit of Molecular Pathology, Immunology and Biochemistry, IRCCS MultiMedica, Milan, Italy; [antonino.bruno@multimedica.it](mailto:antonino.bruno@multimedica.it)

<sup>7</sup> Immunology and General Pathology Laboratory, Department of Biotechnology and Life Sciences, University of Insubria, Varese, Italy; [douglas.noonan@uninsubria.it](mailto:douglas.noonan@uninsubria.it)

<sup>8</sup> Unit of Molecular Pathology, Immunology and Biochemistry, IRCCS MultiMedica, Milan, Italy; [douglas.noonan@multimedica.it](mailto:douglas.noonan@multimedica.it).

\* equal first authorship

+ equal last authorship

# Correspondence: [adriana.albini@multimedica.it](mailto:adriana.albini@multimedica.it)

Received: date; Accepted: date; Published: date

## Abstract:

**Background.** Cardiovascular toxicities still remain one of the most undesirable side effects in cancer patients receiving chemotherapy, and cardiotoxicity has been detected associated with many therapeutic regimens. A number of mechanisms are reported for these effects, some of which are related to inflammation, oxygen radical generation, mitochondrial damage. Extra-virgin olive oil (EVOO) is rich in cancer preventive polyphenols endowed with anti-inflammatory, antioxidant activities which could exert protective effects on the heart cells. One very interesting derivative of EVOO preparation is represented by purified extract from waste waters. Here, we investigated the anti-cancer activity when combined with chemotherapeutics as well as potential cardioprotective activities of a polyphenol-rich extract from waste product of the EVOO, named A009. **Methods and Results.** Mice bearing prostate cancer (PCa) xenografts were treated with cisplatin with and without A009. Tumor cell growth was reduced by cis and by A009 and further hindered by the combination. The effects of the A009 extract on cardiovascular toxicities was investigated in vivo. Hearts of mice were analyzed, and the mitochondria were studied by transmission electron microscopy. A protection activity by A009 was observed. To confirm the in vivo data obtained with cisplatin therapy, tumor cell lines and rat cardiomyocytes were treated with cisplatin in vitro with and without A009. A009 enhanced cisplatin and 5FU reduced cancer cell growth while did not further affect co-treated rat cardiomyocytes. Another frequently used chemotherapeutic agent 5-fluorouracil (5FU), was also tested in this assay a similar effects were observed. The cardioprotective effects of the A009 extract towards 5 FU chemotherapy were further investigated in a second system of *in vitro* cultures, on cardiomyocytes freshly isolated from mice pups. These cells were treated with 5-fluorouracil and A009. Wastewater extract

48 mitigated toxicity of the fluoropyrimidine. **Conclusions.** *In vivo*, we found synergisms of A009 and  
49 cisplatin in prostate cancer treatment. Hearts of mice xenografted with PCa cell lines and receiving  
50 co-treatments of A009 extracts along with cisplatin had reduced mitochondria damage compared  
51 to chemotherapy alone, indicating a cardioprotective role. A009 *in vitro* was additive to cisplatin  
52 and 5FU to reduce cancer cell growth while did not further affect rat cardiomyocytes cell cultures  
53 treated with cisplatin and 5FU. The A009 extract also rescued the proliferation rate of neonatal  
54 murine cardiomyocytes treated with 5-Fluorouracil. Our study demonstrates that the polyphenol  
55 rich purified A009 extracts enhances the effect of chemotherapy *in vitro* and *in vivo* but mitigates  
56 effects on heart and heart cells. It could therefore represent a potential candidate for  
57 cardiovascular prevention in patients undergoing cancer chemotherapy.

58 **Keywords:** Polyphenols; cardioncology; cardio protection; cardio prevention; cardiotoxicity; heart,  
59 cancer  
60

---

## 61 1. Introduction

62 Cancer therapy has made remarkable advances for the treatment of solid and hematological  
63 tumors, leading to significant progresses in the reduction of tumor recurrences [1-7]. Although the  
64 introduction of different antineoplastic agents in the clinic, such as monoclonal antibodies and  
65 tyrosine kinase inhibitors, has significantly augmented life expectancy [8], cardiovascular toxicities  
66 remain a major clinical concern, sometimes generating higher morbidity and mortality than tumor  
67 recurrences [8]. Cardiovascular toxicities, defined as “toxicities affecting the heart” are among the  
68 most frequent undesirable effects on cancer chemotherapy. Major effects of chemotherapy-induced  
69 cardiovascular toxicities include arrhythmias, myocardial ischemia, coronary artery diseases,  
70 hypertension, and myocardial dysfunctions [7].

71 A major problem in the manifestation of clinically evident cardiotoxic events is the fact that  
72 they are often asymptomatic, and therefore negatively impact the cardiological prognosis of cancer  
73 patients as well as significantly limiting applicable treatment options [18,21-24]. In fact, even minor  
74 cardiac dysfunctions significantly restrict the choice of therapeutic programs, forcing the selection  
75 of those considered less aggressive and, as such, potentially less effective [1-7]. Occurrence of  
76 chemotherapy-induced cardiotoxicity is continuously increasing, as a consequence of the growing  
77 number of patients undergoing chemotherapy and the introduction of new, more aggressive  
78 anticancer drugs, often administered in combination with other toxic compounds [1-7].

79 This knowledge suggested that a strict dialogue between the oncologists and the  
80 cardiologists is necessary, when selecting the proper chemotherapy intervention as well as cardiac  
81 monitoring in cancer patients, bringing to a new discipline termed cardio-oncology [2].

82 Mitochondria represent the metabolic engine, governing and sensing the cellular energy  
83 requirements during physiological and pathological conditions [9,10]. The maintenance of  
84 mitochondrial membrane potential is crucial to supply gradients for ATP synthesis [11]. Oxidative  
85 stress, a major hallmark of age- and chronic inflammatory-related disorders and significantly  
86 impact on mitochondrial functionality [11]. Generation of ROS and mitochondrial damage are  
87 major drivers of chemotherapy-induced cardiotoxicities [12-15].

88 Polyphenols act as antioxidants by contrasting the generation of reactive oxygen species (ROS) [5]  
89 that drive cellular and mitochondrial damage.

90 It has been widely demonstrated that adherence to the Mediterranean diet is associated  
91 with a reduced risk of developing cardiovascular diseases. In recent decades, numerous  
92 epidemiological and interventional studies have confirmed this observation, underlining the close  
93 relationship between the Mediterranean diet and cardiovascular diseases [16-18]. In this context,  
94 extra virgin olive oil (EVOO), the most representative component of this diet, seems to be important  
95 in reducing the incidence of cardiovascular events, including myocardial infarction and stroke [19].  
96 Current research on the beneficial effect of EVOO is focused on defining its protective effects

97 against cardiovascular risk factors, such as inflammation, oxidative stress, coagulation, platelet  
98 aggregation, fibrinolysis, and endothelial or lipid dysfunction. A further approach is based on the  
99 modulation of conditions that predispose people to cardiovascular events, such as obesity,  
100 metabolic syndrome or type 2 diabetes mellitus, and chemotherapy [18,20-23]. The protective  
101 activity of EVOO results from high levels of phenolic compounds, monounsaturated fatty acids  
102 (MUFA) and other minor compounds present in EVOO [19].

103 Industrial EVOO processing is associated with the generation of large volume of liquid waste  
104 product, termed olive mill wastewater (OMWW) [24,25]. OMWW are rich in water soluble  
105 polyphenols endowed with anti-bacterial, anti-antioxidant, cytoprotective, [26-28] thus  
106 representing a valid waste product to be repositioned in the market.

107 Here, we investigate the potential cardioprotective activity of a polyphenol-rich, EVOO-  
108 derived antioxidant extract (A009), obtained from olive mill wastewater (OMWW).

109 Extracts from A009, have been reported to exhibit chemopreventive and angiopreventive  
110 properties, *in vitro* and *in vivo*, in different cancer types [29,30]

111 We examine A009 effect on tumor growth when combined with a chemotherapeutic agent and  
112 evaluated the effect of the combination on the heart and cardiomyocytes, at both a cellular and  
113 molecular level, using *in vivo* (mice with prostate tumors) and *in vitro* models.  
114

## 115 2. Materials and Methods

### 116 2.1 Chemicals

117 Cis-Diammine platinum dichloride (Cis-Pt) and 5-Fluorouracil (5FU), all purchase by SIGMA  
118 Aldrich were dissolved in Dimethyl sulfoxide (DMSO) and used for *in vitro* experiments as detailed  
119 below. 3-(4,5-dimethylthiazol-2-yl)-2,5-diphenyltetrazolium bromide (MTT) was purchased by  
120 SIGMA Aldrich and resuspended at 5 mg/ml. A009 polyphenol -rich extract, derived from olive  
121 mill wastewater (OMWW) processing, were purchased by Azienda Agricola fattoria La Vialla,  
122 Castiglion Fibocchi, Arezzo Italy.

### 123 2.2 Preparation of A009 extracts

124 The A009 was obtained from the OMWW derived from the processing of EVOO. Extraction  
125 procedures and polyphenol quantification has been previously published [25-27]. The polyphenol  
126 composition is not altered, following different years of cultivars [25-27]. Polyphenol content of the  
127 A009 extract is showed in supplemental table 1 and has been published [30,31].  
128

### 129 2.3 Cell line culture and maintenances

130  
131 The human prostate cancer (PCa) cell lines DU-145, 22Rv1 and the colorectal cancer cell line  
132 HT29 (all purchased by ATCC) were maintained in RPMI 1640 medium, supplemented with 10%  
133 Fetal Bovine Serum (FBS) (Euroclone), 2 mM l-glutamine (Euroclone), 100 U/ml penicillin and 100  
134 µg/ml streptomycin (Euroclone), at 37°C, 5% CO<sub>2</sub>. The rat cardiomyocyte cell line H9C2  
135 (PromoCell) was maintained in Myocyte Growth Medium medium plus Myocyte supplements mix  
136 (PromoCell), addition with 10% Fetal Bovine Serum (FBS) (Euroclone), 2 mM L-glutamine  
137 (Euroclone), 100 U/ml penicillin and 100 µg/ml streptomycin (Euroclone), at 37°C, 5% CO<sub>2</sub>. Cells  
138 were routinely screened for eventual mycoplasma contaminations.  
139

### 140 2.4 Detection of cardioprotective activities in *in vivo* tumor xenograft models

141

142 We used a mouse model of prostate cancer to determine whether co-treatment with the  
143 chemotherapeutic agent cisplatin and A009 extract could exert a protective effect on the hearts of  
144 the treated animals. The effects of the A009 extracts in inhibiting prostate cancer (PCa) tumor cell  
145 growth was assessed using an *in vivo* xenograft model. 5-week-old male Nu/MRI nude mice (from

146 Charles River) were used, with four animals per experimental group. Animals were housed in a  
147 conventional animal facility with 12:12 h light dark cycles and fed ad libitum. Animals were  
148 subcutaneously injected into the right flank with  $2.5 \times 10^6$  22Rv1 cells or DU-145 cells, in a total  
149 volume of 300  $\mu$ l, containing 50% serum free RPMI 1650, and 50% 10 mg/mL reduced growth factor  
150 Matrigel (Corning) with or without A009 (dilution 1:250). From day 0 animals received A009 daily  
151 (dilution 1:250), in the drinking water. When tumors were palpable, mice received Cisplatin, 7  
152 mg/kg *i.p.*, twice a week. At day 27, the tumor cell growth was stopped, tumors were excised,  
153 weighted and tumor volume was measured with a caliper and determined using the formula  
154  $(W^2 \times L)/2$ . Hearts were surgically removed from animals and used for transmission electron  
155 microscopy analyses.

156 All the procedures involving the animals and their care were performed according to the  
157 institutional guidelines, in compliance with national and international law and guidelines for the  
158 use of animals in biomedical research and housed in pathogen-free conditions. All the procedures  
159 applied were approved by the local animal experimentation ethics committee (ID# #06\_16 Noonan)  
160 of the University of Insubria and by the Italian Health Ministry (ID#225/2017-PR).

161

### 162 *2.5 Transmission Electron Microscopy analysis of murine hearts*

163

164 Hearts were surgically excised from animals and extensively washed in PBS. Heart sections  
165 were obtained using a scalpel and then placed in fixing solution for TEM processing (2% PFA, 2%  
166 glutaraldehyde), finally post-fixed using 1% osmium tetroxide and embedded in an Epon-Araldite  
167 resin. Following exposure to uranyl acetate and lead citrate, thin sections were analyzed by TEM,  
168 using a Morgagni electron microscope (Philips) at 3500X magnification, to detect mitochondrial  
169 alterations in terms of morphology, size, organization and quantity. The number of altered  
170 mitochondria per section, exhibiting altered morphology/shape, was counted using the ImageJ  
171 software.

172

### 173 *2.6 Combination effect of chemotherapy and A009 on cancer cell lines.*

174

175 To investigate whether the A009 extract could synergize with chemotherapy, the prostate  
176 cancer DU-145 cell line or the colorectal cancer HT-29 cell line were treated with Cis-Pt 100  $\mu$ M or 5-  
177 FU 100  $\mu$ M, respectively, alone or in combination with A009 L3 or L4 extracts, for 24 to 72 hours.  
178 Detection of cell viability was determined by MTT (3-[4,5-dimethylthiazole-2-yl]-2,5-  
179 diphenyltetrazolium bromide) assay, on 3,000 cardiomyocytes/well, seeded into a 96 well plate.

180

### 181 *2.7 Effects of A009 extracts on adult rat cardiomyocyte*

182

183 To evaluate the effects of the A009 extracts on chemotherapy induced cardiotoxicity, after  
184 preliminary experiment to assess dosages, adult rat cardiomyocyte H9C2 cells were treated with 5-  
185 FU 100  $\mu$ M or Cis-Pt 100  $\mu$ M, alone or in combination with A009 L3 or L4 extracts, for 24 to 72  
186 hours. The schedule treatments included a prevention approach by pre-treating cardiomyocyte  
187 with A009 L3 and L4 extracts at T24 to T48 h, subsequently A009 L3 or L4 extracts were removed,  
188 and wells were auditioned with fresh medium containing Cis-Pt 100  $\mu$ M or 5-Fu100  $\mu$ M. Detection  
189 of cell viability was determined by MTT assay described in 2.6.

### 190 *2.8 Isolation of neonatal murine cardiomyocytes*

191

192 Cardiomyocytes were isolated from neonatal C57/Bl6 mice at 2 days after birth as  
193 previously described, with minor modifications [32]. Briefly, hearts were removed and cleaned in  
194 calcium and bicarbonate-free Hanks' balanced salt solution with Hepes (CBFHH, containing 137  
195 mM NaCl, 5.36 mM KCl, 0.81 mM MgSO<sub>4</sub> 7H<sub>2</sub>O, 5.55 mM dextrose, 0.44 mM KH<sub>2</sub>PO<sub>4</sub>, 0.34 mM  
196 Na<sub>2</sub>HPO<sub>4</sub> 7H<sub>2</sub>O, and 20.06 mM HEPES). Excess blood and valves were removed, and hearts were  
diced. The tissue was then enzymatically digested using CBFHH supplemented with 1.75 mg/ml of

197 Trypsin (BD Biosciences) and 20 mg/ml of DNase I (Sigma). Tissue was digested for 3 hours, with  
 198 cells harvested into fetal bovine serum (FBS) every 10 min to stop the digestion. Cells were then  
 199 filtered using a 40 µm cell strainer and pre-plated for 2 h to remove contaminating fibroblasts.  
 200 Finally, cardiomyocytes were collected and seeded on tissue culture plates treated for primary  
 201 cultures. Cells were cultured in Dulbecco's modified Eagle medium 4.5 g/L glucose (DMEM, Life  
 202 Technologies) supplemented with 5% FBS, 20 mg/ml vitamin B12 (Sigma), 100 U/ml penicillin and  
 203 100 mg/ml streptomycin (Sigma).

204

### 205 2.9 Effects of A009 extracts on neonatal murine-derived cardiomyocytes

206

207 To evaluate the effect of the A009 extract on cardiomyocyte viability *in vitro*, 30,000  
 208 cardiomyocytes/well were seeded into a 96 well plate. One day after plating, cells were treated with  
 209 L3 and L4 A009 extracts, dilution of 1:800, for 24 h. On day 2, cells were treated with 4.6 µM of 5-  
 210 Fluorouracil. Following 24 and 48 hours, cells were fixed and stained using anti-Cardiac Troponin I  
 211 antibody (Abcam, ab47003, dilution of 1:200) and Hoechst 33342 (Invitrogen, H3570, dilution of  
 212 1:5000). The number of cardiomyocytes for each time point was counted in three independent  
 213 experiments.

214

## 215 3. Results

### 216 3.1 Cardioprotective activities of A009 extracts in *in vivo* models of cardiotoxicity induced by anticancer drug

217

218 We used a mouse model of prostate cancer to determine the A009 effect on tumors and the  
 219 hearts of mice treated with the chemotherapeutic agent cisplatin. During the treatment schedule,  
 220 we did not observe behavioral changes, alterations in food intake, water consumption, or dejections  
 221 by the animals included in all the experimental groups of the study (Table 1).

|                                                 | NT     | Cisplatin<br>(7mg/kg) | A009 1:250 | Cisplatin (7mg/kg) +<br>A009 1:250 |
|-------------------------------------------------|--------|-----------------------|------------|------------------------------------|
| <b>Skin peeling</b>                             | 0 (10) | 5 (9)                 | 1 (10)     | 2 (10)                             |
| <b>Dehydration</b>                              | 0 (10) | 0 (9)                 | 0 (10)     | 0 (10)                             |
| <b>Alterations in<br/>water<br/>consumption</b> | 0 (10) | 0 (9)                 | 0 (10)     | 0 (10)                             |
| <b>Alterations in food<br/>consumption</b>      | 0 (10) | 0 (9)                 | 0 (10)     | 0 (10)                             |
| <b>Urine</b>                                    | 0 (10) | 0 (9)                 | 0 (10)     | 0 (10)                             |
| <b>Feces</b>                                    | 0 (10) | 0 (9)                 | 0 (10)     | 0 (10)                             |

222

223 **Table 1. Monitoring of healthy conditions during *in vivo* treatments.** The healthy state on mice receiving single agent  
 224 (A009, dilution 1:250) alone, or Cisplatin (7 mg/Kg) alone, or the combinations of Cisplatin and the A009 extract was daily  
 225 monitored. As readout of clinical parameters, the presence of skin peeling, dissipation, alterations of water and food



226 consumption, alteration in solid (feces) and liquid (urine) dejection are showed. Data are presented as (number of  
 227 events)/total animal per experimental conditions  
 228

229 Animals receiving the different treatment did not show weight loss during the tumor cell  
 230 growth kinetic (Figure 1A). Interesting, A009 also reduced the skin peeling induced by cisplatin  
 231 treatments (from 5/9 mice to (2/10 mice) (Table 1). We found that the combination of cisplatin with  
 232 the A009 extract synergized further reduced the PCa cell tumor weight, as compared to the  
 233 treatment with cisplatin alone (Figure 1 B). The morphological analysis did not reveal macroscopic  
 234 differences amongst the hearts of the various experimental groups (data not shown).

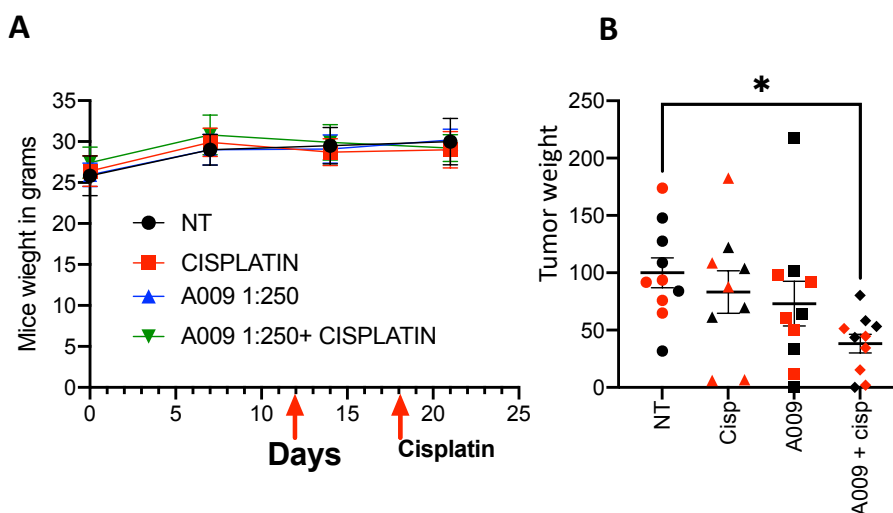

235  
 236 **Figure 1: Dietary administration of the A009 extract, in combination with chemotherapy, result in both synergism by**  
 237 **reducing tumor weight.** Dietary administration (drinking water) of A009 extracts synergize with chemotherapy by reducing  
 238 tumor weight *in vivo*. In panel A the red arrows indicate the dose of the cisplatin (7 mg/Kg), the mice weights were same. In  
 239 panel B, the effects of the combination of A009 extract with cisplatin (7 mg/Kg), was determined using an orthotopic *in vivo*  
 240 model of prostate cancer cells DU-145 (red), 22Rv1 (black). Data are showed as mean  $\pm$  SEM, one-way ANOVA, \* $p < 0.05$ .  
 241

242 However ultrastructural analysis, using transmission electron microscopy (TEM), showed that  
 243 animals treated with cisplatin which received also the A009 extract have a reduced number of  
 244 damaged mitochondria (showing a rounder shape and having mitochondrial cristae better  
 245 organized and higher in number), as compared to the hearts of mice treated with cisplatin only  
 246 (Figure 2A-B). We also observed a more regular muscle fiber disposition in the hearts of animals  
 247 treated with A009 and cisplatin as compared to those treated with cisplatin alone.

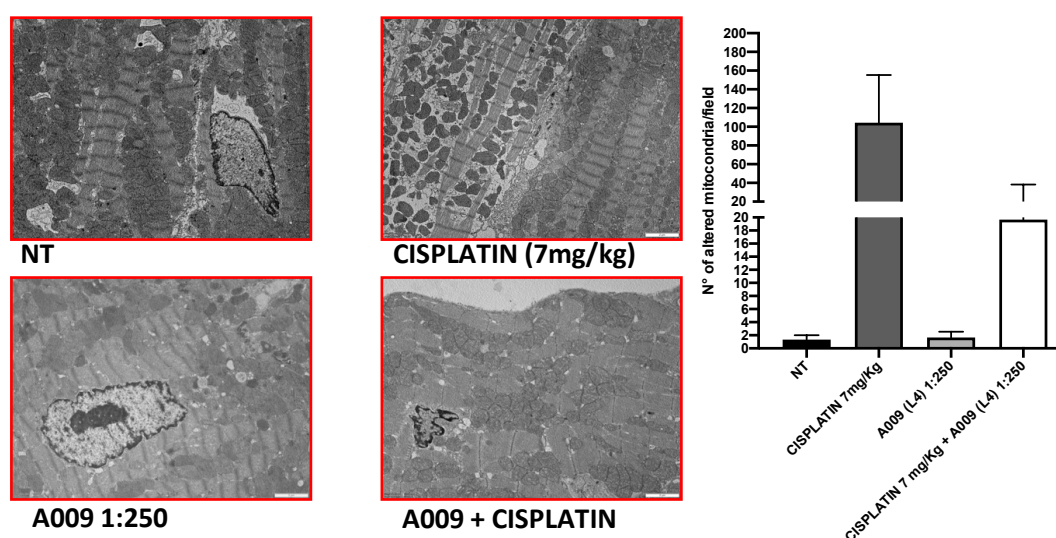

248  
 249

250  
251  
252  
253  
254  
255  
256  
257  
258  
259  
260  
261  
262  
263  
264  
265  
266  
267  
268  
269  
270  
271  
272  
273  
274  
275  
276  
277  
278  
279  
280  
281  
282  
283  
284  
285  
286  
287  
288  
289  
290  
291  
292  
293  
294  
295  
296  
297  
298  
299  
300  
301  
302  
303  
304  
305  
306

**Figure 2: A009 cardioprotective activities against cisplatin-induce cardiotoxicity *in vivo*.** Mitochondria number, shape/morphology and color was monitored, by transmission electron microscopy (TEM) on hearts from mice treated with cisplatin alone (7 mg/Kg), A009 extract (dilution 1:250, in drinking water) or the cisplatin-A009 extract combination. Data are showed as mean  $\pm$  SEM, one-way ANOVA, \* $p$ <0.05, \*\* $p$ <0.01, \*\*\* $p$ <0.001, \*\*\*\* $p$ <0.0001. A009 batch extract; NT: vehicle control.

### 3.2 A009 activities against tumor cell lines and heart cell lines

Cisplatin and 5-FU treatment decreased both prostate and colon cancer cell growth; The proliferation of the tumors treated with A009 was also significantly different from the vehicle control. A009 enhanced the effect of the cisplatin and 5-FU alone (Figure 3). 5-FU and cisplatin were toxic to rat cardiomyocytes, while the A009 was not. Furthermore, A009 added to Cisplatin or 5FU did not enhance the growth reduction (Figure 3). Importantly, while A009 significantly diminishes tumor cell proliferation rate and has additive effect with cisplatin and 5-FU, it does not affect myocyte growth and it does not enhance toxicity of cisplatin and 5-FU (Figure 3).

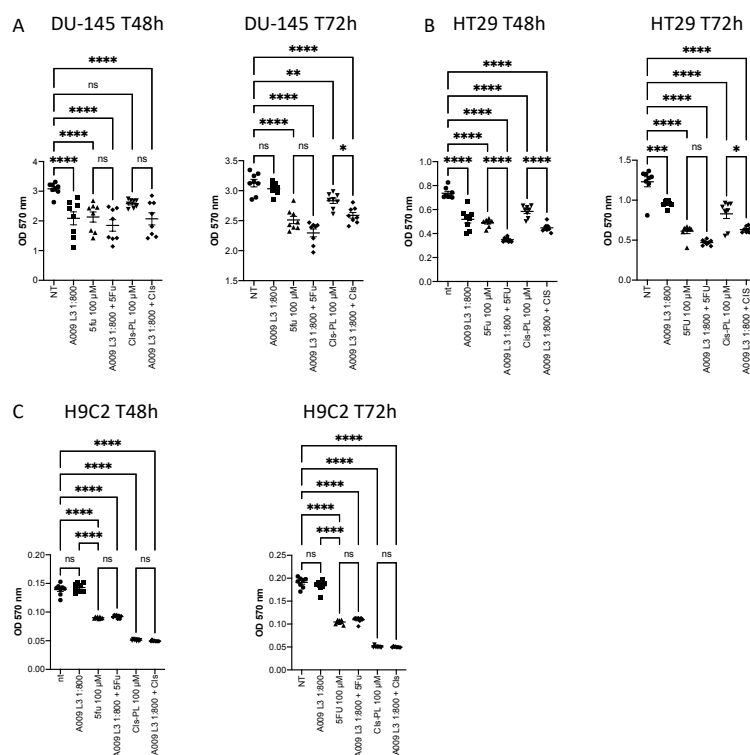

**Figure 3: Activities of A009 extracts combined with chemotherapy on tumor cells and cardiomyocytes.** A009 (batch L3) decrease the proliferation rate of tumors cells *in vitro* (A: DU-145 PCa and B: HT29 CRC) and has additive effects on the cisplatin and the 5-Fluorouracil (5FU) effects. The cardiomyocytes proliferation rate is not affected by A009 alone (C), and reduced proliferation by 5FU and cisplatin is not enhanced by A009 *in vitro*. Data are showed as mean  $\pm$  SEM, one-way ANOVA, \* $p$ <0.05, \*\* $p$ <0.01, \*\*\* $p$ <0.001, \*\*\*\* $p$ <0.0001.

### 3.3 Protective activities of A009 extracts on neonatal murine cardiomyocytes

We observed a cardioprotective effect of the A009 extract in neonatal murine cardiomyocytes, following co-treatment with the chemotherapeutic drugs 5-fluorouracil (5-FU). The protective effect of the A009 extract was determined by quantifying the number of surviving cardiomyocytes at 24 hours (Figure 2 A) and 48 hours (Figure 2 B) post treatment. At the early time point of 24 h, A009 showed a cardioprotective effect in basal conditions, and was slightly protective against 5-FU (Figure 4). After 48 h, A009 was consistently cardioprotective against both 5-FU (Figure 4)

307

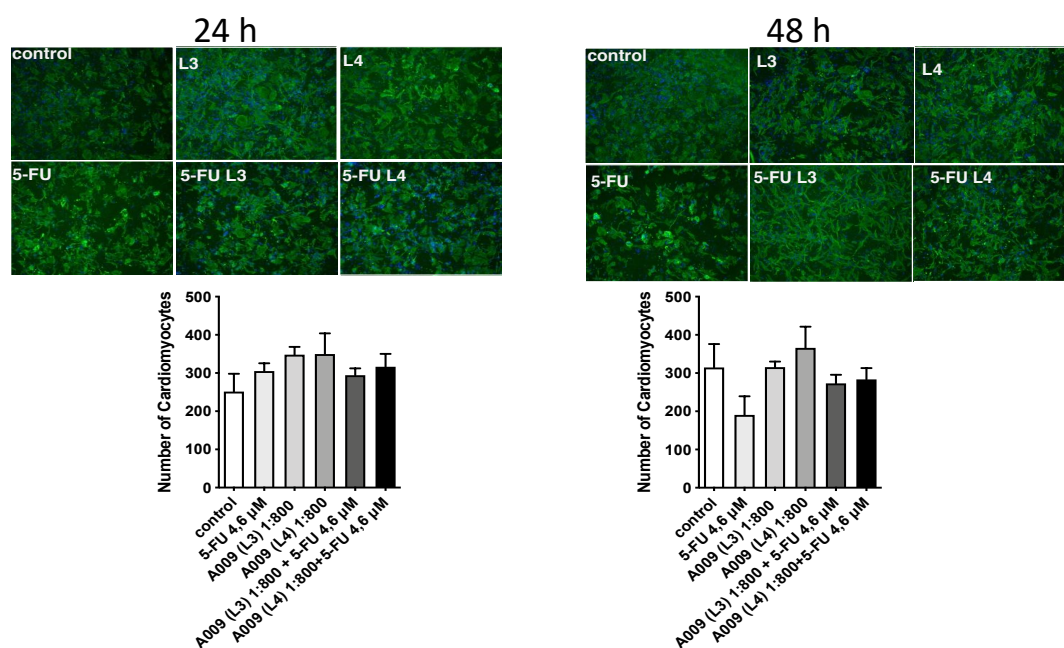

308

309

310

311

312

313

314

**Figure 4: Protective activities of A009 extracts on neonatal murine cardiomyocytes.** The cardioprotective effects of the A009 extract on chemotherapy induced cardiotoxicities was assessed, *in vitro*, on neonatal murine cardiomyocytes. Neonatal murine cardiomyocytes were exposed for 24 hours (A) and 48 hours (B) to 5-FU (4.6 μM) alone, A009 extracts (dilution 1:800, batches L3 or L4) alone, or the combination of the 5-FU and A009 extracts (dilution 1:800, batches L3 or L4). Data are showed as mean ± SEM. 5-FU: 5-fluoro-Uracile; L3/L4: A009 batch extract; NT: vehicle control.

315

#### 4. Discussion

316

317

318

319

320

321

322

323

324

325

326

327

328

329

330

331

332

333

334

335

336

337

Cardiovascular toxicities still remain a major challenge in clinical oncology [1-4,8]. While chemotherapeutic agents efficiently target malignantly transformed cells, they simultaneously induce cell death of healthy cells [1-4,8]. The cardiovascular system is the major off target of anti-neoplastic drugs [1-4,8]. Most of the cytotoxic activities of chemotherapeutic agents on normal cells are due to the induction of exacerbated oxidative stress, through the generation of both ROS and reactive nitrogen species (RNS) [3,32]. Agents such as anti-inflammatory, antioxidants, able to counteract these effects, can be used to reduce side effects from chemotherapeutics and can be easily tolerated by oncologic patients and administered by dietary regimen [33,34].

Many dietary polyphenols demonstrate antioxidant and cytoprotective properties [35-38]. We tested the ability of a polyphenol-rich purified extract of OMWW, termed A009, to protect from cardiovascular damages induced by anti-cancer agents.

Mimicking a scenario closer to the clinic, we tested the cardioprotective properties of the A009 extract in *in vivo* murine models of tumor xenograft treated with cisplatin, a chemotherapy agent associated with cardiotoxicity and mitotoxicity [39-42]. Mice subcutaneously injected with prostate cancer cell line, co-treated with A009 and the chemotherapeutic drug cisplatin showed a reduced number of abnormal and damaged mitochondria, as compared to those treated with cisplatin alone. Mitochondria have an essential role in myocardial tissue homeostasis [43,44] and diverse chemical compounds and chemotherapy drugs have been known to directly or indirectly modulate cardiac mitochondrial function [45,46]. Mitochondrial oxidative stress and dysfunction is a common mechanism in cardiotoxic effects [13,14,39,41-43].

Cisplatin was tested *in vitro* on prostate cancer cells, with or without A009 and its effects compared to the ones on rat cardiomyocytes.



338 5-FU is also a common cancer chemotherapeutic. We had studied human cardiac myocytes *in*  
339 *vitro* senescent phenotype and autophagic features upon 5FU treatment [6]. While A009  
340 significantly diminished tumor cell proliferation rate and had additive effect with cisplatin and 5-  
341 FU, it did not affect myocyte growth as single treatment and it did not enhance toxicity of cisplatin  
342 and 5-FU.

343 Based on these results, we investigated the effects of the A009 extracts also on fresh  
344 cardiomyocytes isolated from neonatal mice. In these experiments, we validate 5-FU on  
345 cardiotoxicity [2,3,6,37,38]. We observed that cardiomyocytes co-treated with the A009 extracts and  
346 a chemotherapeutic drug 5-FU exhibited less reduction of the number of cardiomyocytes, as  
347 compared with the drug alone. This rescue was maintained from 24 to 48 hours of cardiomyocyte  
348 culture and treatment and potentially related to the antioxidant polyphenols present in the A009  
349 extracts.

## 350 5. Conclusions

### 351 A009 extracts enhances chemotherapy effects on tumor cells *in vivo* and *in vitro*.

352 Here, we demonstrated that the A009 extracts, although additive in cancer therapy do not have  
353 cardiotoxic effects, and actually can mitigate chemotherapy-induced cardiotoxicity. One of the  
354 effects, detected by transmission electron microscopy on hearts of the treated mice, suggests  
355 mitochondrial protection and anti-oxidant capabilities of A009.

356 Our study demonstrates that the polyphenol rich purified A009 extracts are a valid candidate  
357 for combination chemotherapy and for cardiovascular protection from induced cardiac damage.

358  
359 **Supplementary Figure 1: Phenolic composition of A009 was obtained by HPLC-DADMS-MS.** Samples were  
360 analyzed by HPLC with UV-vis and MS detection. The identification of phenolic compounds from samples  
361 was carried out as previously reported by interpreting their mass spectra determined via LC-MS-MS and  
362 comparing to data reported in literature identified the compounds.

363  
364 **Supplementary Figure 2: Activities of a second A009 batch on DU-145 PCa tumor cell line.** A009 (batch L4)  
365 decrease the proliferation rate of DU-145 PCa tumors line cells *in vitro* and has additive effects on the cisplatin).  
366 Data are showed as mean  $\pm$  SEM, one-way ANOVA, \*\*p<0.01, \*\*\*p<0.001, \*\*\*\*p<0.0001.

367 **Author Contributions:** Conceptualization, A.A, A.B, S.Z., F.S. and D.M.N; methodology, N.R., M.R., M.M. G.F,  
368 B.D., G.F.; data analysis, A.B., D.B., N.R., S.Z., M.R., DMN; resources, A.A.; data curation, AB, DB, NR, MR, M.  
369 M. G. F, DB; writing—original draft preparation, A.A., A.B., DMN; supervision, A.A., A.B., D. M. N.; funding  
370 acquisition, S. Z., A.A. All authors have read and agreed to the published version of the manuscript

371 **Funding:** This work was supported by institutional funds and salaries. This work has been supported by  
372 Italian Ministry of Health Ricerca Corrente - IRCCS MultiMedica (A.B., D.M.N).

373 **Acknowledgments:** We thank Paola Corradino for support in literature research and text editing.

## 374 References

- 375  
376 1. Albini, A.; Donatelli, F.; Focaccetti, C.; D'Elisio, M.M.; Noonan, D.M. Renal dysfunction and increased  
377 risk of cardiotoxicity with trastuzumab therapy: a new challenge in cardio-oncology. *Intern Emerg*  
378 *Med* **2012**, *7*, 399-401, doi:10.1007/s11739-012-0845-2.
- 379 2. Albini, A.; Pennesi, G.; Donatelli, F.; Cammarota, R.; De Flora, S.; Noonan, D.M. Cardiotoxicity of  
380 anticancer drugs: the need for cardio-oncology and cardio-oncological prevention. *J Natl Cancer Inst*  
381 **2010**, *102*, 14-25, doi:10.1093/jnci/djp440.
- 382 3. Angsutararux, P.; Luanpitpong, S.; Issaragrisil, S. Chemotherapy-Induced Cardiotoxicity: Overview  
383 of the Roles of Oxidative Stress. *Oxid Med Cell Longev* **2015**, *2015*, 795602, doi:10.1155/2015/795602.

- 384 4. Conway, A.; McCarthy, A.L.; Lawrence, P.; Clark, R.A. The prevention, detection and management of  
385 cancer treatment-induced cardiotoxicity: a meta-review. *BMC Cancer* **2015**, *15*, 366, doi:10.1186/s12885-  
386 015-1407-6.
- 387 5. Curigliano, G.; Cardinale, D.; Dent, S.; Criscitiello, C.; Aseyev, O.; Lenihan, D.; Cipolla, C.M.  
388 Cardiotoxicity of anticancer treatments: Epidemiology, detection, and management. *CA Cancer J Clin*  
389 **2016**, *66*, 309-325, doi:10.3322/caac.21341.
- 390 6. Focaccetti, C.; Bruno, A.; Magnani, E.; Bartolini, D.; Principi, E.; Dallaglio, K.; Bucci, E.O.; Finzi, G.;  
391 Sessa, F.; Noonan, D.M., et al. Effects of 5-fluorouracil on morphology, cell cycle, proliferation,  
392 apoptosis, autophagy and ROS production in endothelial cells and cardiomyocytes. *PLoS One* **2015**,  
393 *10*, e0115686, doi:10.1371/journal.pone.0115686.
- 394 7. Polonsky, T.S.; DeCara, J.M. Risk factors for chemotherapy-related cardiac toxicity. *Curr Opin Cardiol*  
395 **2019**, *34*, 283-288, doi:10.1097/HCO.0000000000000619.
- 396 8. Senkus, E.; Jassem, J. Cardiovascular effects of systemic cancer treatment. *Cancer treatment reviews*  
397 **2011**, *37*, 300-311, doi:10.1016/j.ctrv.2010.11.001.
- 398 9. Missiroli, S.; Genovese, I.; Perrone, M.; Vezzani, B.; Vitto, V.A.M.; Giorgi, C. The Role of Mitochondria  
399 in Inflammation: From Cancer to Neurodegenerative Disorders. *J Clin Med* **2020**, *9*,  
400 doi:10.3390/jcm9030740.
- 401 10. Vringer, E.; Tait, S.W.G. Mitochondria and Inflammation: Cell Death Heats Up. *Front Cell Dev Biol*  
402 **2019**, *7*, 100, doi:10.3389/fcell.2019.00100.
- 403 11. Bhatti, J.S.; Bhatti, G.K.; Reddy, P.H. Mitochondrial dysfunction and oxidative stress in metabolic  
404 disorders - A step towards mitochondria based therapeutic strategies. *Biochim Biophys Acta Mol Basis*  
405 *Dis* **2017**, *1863*, 1066-1077, doi:10.1016/j.bbadis.2016.11.010.
- 406 12. Hahn, V.S.; Lenihan, D.J.; Ky, B. Cancer therapy-induced cardiotoxicity: basic mechanisms and  
407 potential cardioprotective therapies. *J Am Heart Assoc* **2014**, *3*, e000665, doi:10.1161/JAHA.113.000665.
- 408 13. Ichikawa, Y.; Ghanefar, M.; Bayeva, M.; Wu, R.; Khechaduri, A.; Naga Prasad, S.V.; Mutharasan, R.K.;  
409 Naik, T.J.; Ardehali, H. Cardiotoxicity of doxorubicin is mediated through mitochondrial iron  
410 accumulation. *J Clin Invest* **2014**, *124*, 617-630, doi:10.1172/JCI72931.
- 411 14. Nitiss, K.C.; Nitiss, J.L. Twisting and ironing: doxorubicin cardiotoxicity by mitochondrial DNA  
412 damage. *Clin Cancer Res* **2014**, *20*, 4737-4739, doi:10.1158/1078-0432.CCR-14-0821.
- 413 15. Zhang, X.; Hu, C.; Kong, C.Y.; Song, P.; Wu, H.M.; Xu, S.C.; Yuan, Y.P.; Deng, W.; Ma, Z.G.; Tang,  
414 Q.Z. FNDC5 alleviates oxidative stress and cardiomyocyte apoptosis in doxorubicin-induced  
415 cardiotoxicity via activating AKT. *Cell Death Differ* **2020**, *27*, 540-555, doi:10.1038/s41418-019-0372-z.
- 416 16. Billingsley, H.E.; Carbone, S. The antioxidant potential of the Mediterranean diet in patients at high  
417 cardiovascular risk: an in-depth review of the PREDIMED. *Nutr Diabetes* **2018**, *8*, 13,  
418 doi:10.1038/s41387-018-0025-1.
- 419 17. Grosso, G.; Mistretta, A.; Frigiola, A.; Gruttadauria, S.; Biondi, A.; Basile, F.; Vitaglione, P.; D'Orazio,  
420 N.; Galvano, F. Mediterranean diet and cardiovascular risk factors: a systematic review. *Crit Rev Food*  
421 *Sci Nutr* **2014**, *54*, 593-610, doi:10.1080/10408398.2011.596955.
- 422 18. Estruch, R.; Ros, E.; Salas-Salvado, J.; Covas, M.I.; Corella, D.; Aros, F.; Gomez-Gracia, E.; Ruiz-  
423 Gutierrez, V.; Fiol, M.; Lapetra, J., et al. Primary Prevention of Cardiovascular Disease with a  
424 Mediterranean Diet Supplemented with Extra-Virgin Olive Oil or Nuts. *N Engl J Med* **2018**, *378*, e34,  
425 doi:10.1056/NEJMoa1800389.
- 426 19. Nocella, C.; Cammisotto, V.; Fianchini, L.; D'Amico, A.; Novo, M.; Castellani, V.; Stefanini, L.; Violi,  
427 F.; Carnevale, R. Extra Virgin Olive Oil and Cardiovascular Diseases: Benefits for Human Health.  
428 *Endocrine, metabolic & immune disorders drug targets* **2018**, *18*, 4-13,  
429 doi:10.2174/1871530317666171114121533.
- 430 20. Marcelino, G.; Hiane, P.A.; Freitas, K.C.; Santana, L.F.; Pott, A.; Donadon, J.R.; Guimaraes, R.C.A.  
431 Effects of Olive Oil and Its Minor Components on Cardiovascular Diseases, Inflammation, and Gut  
432 Microbiota. *Nutrients* **2019**, *11*, doi:10.3390/nu11081826.
- 433 21. Martinez-Gonzalez, M.A.; Gea, A.; Ruiz-Canela, M. The Mediterranean Diet and Cardiovascular  
434 Health. *Circ Res* **2019**, *124*, 779-798, doi:10.1161/CIRCRESAHA.118.313348.
- 435 22. Mazzocchi, A.; Leone, L.; Agostoni, C.; Pali-Scholl, I. The Secrets of the Mediterranean Diet. Does  
436 [Only] Olive Oil Matter? *Nutrients* **2019**, *11*, doi:10.3390/nu11122941.
- 437 23. Nediani, C.; Ruzzolini, J.; Romani, A.; Calorini, L. Oleuropein, a Bioactive Compound from *Olea*  
438 *europaea* L., as a Potential Preventive and Therapeutic Agent in Non-Communicable Diseases.  
439 *Antioxidants (Basel)* **2019**, *8*, doi:10.3390/antiox8120578.
- 440 24. El-Abbassi, A.; Kiai, H.; Hafidi, A. Phenolic profile and antioxidant activities of olive mill wastewater.  
441 *Food Chem* **2012**, *132*, 406-412, doi:10.1016/j.foodchem.2011.11.013.

- 442 25. Vougiopoulou, K.; Angelopoulou, M.T.; Pratsinis, H.; Grougnet, R.; Halabalaki, M.; Kletsas, D.;  
443 Deguin, B.; Skaltsounis, L.A. Chemical and Biological Investigation of Olive Mill Waste Water -  
444 OMWW Secoiridoid Lactones. *Planta Med* **2015**, *81*, 1205-1212, doi:10.1055/s-0035-1546243.
- 445 26. Belaqziz, M.; Tan, S.P.; El-Abbassi, A.; Kiai, H.; Hafidi, A.; O'Donovan, O.; McLoughlin, P.  
446 Assessment of the antioxidant and antibacterial activities of different olive processing wastewaters.  
447 *PLoS One* **2017**, *12*, e0182622, doi:10.1371/journal.pone.0182622.
- 448 27. Schaffer, S.; Muller, W.E.; Eckert, G.P. Cytoprotective effects of olive mill wastewater extract and its  
449 main constituent hydroxytyrosol in PC12 cells. *Pharmacol Res* **2010**, *62*, 322-327,  
450 doi:10.1016/j.phrs.2010.06.004.
- 451 28. Abu-Lafi, S.; Al-Natsheh, M.S.; Yaghmoor, R.; Al-Rimawi, F. Enrichment of Phenolic Compounds  
452 from Olive Mill Wastewater and In Vitro Evaluation of Their Antimicrobial Activities. *Evid Based*  
453 *Complement Alternat Med* **2017**, *2017*, 3706915, doi:10.1155/2017/3706915.
- 454 29. Gallazzi, M.; Festa, M.; Corradino, P.; Sansone, C.; Albin, A.; Noonan, D.M. An Extract of Olive Mill  
455 Wastewater Downregulates Growth, Adhesion and Invasion Pathways in Lung Cancer Cells:  
456 Involvement of CXCR4. *Nutrients* **2020**, *12*, doi:10.3390/nu12040903.
- 457 30. Baci, D.; Gallazzi, M.; Cascini, C.; Tramacere, M.; De Stefano, D.; Bruno, A.; Noonan, D.M.; Albin, A.  
458 Downregulation of Pro-Inflammatory and Pro-Angiogenic Pathways in Prostate Cancer Cells by a  
459 Polyphenol-Rich Extract from Olive Mill Wastewater. *Int J Mol Sci* **2019**, *20*, doi:10.3390/ijms20020307.
- 460 31. Bassani B, R.T., De Stefano D, Pizzichini D, Corradino P, Macrì N, Noonan DM, Albin A, Bruno A. .  
461 Potential chemopreventive activities of a polyphenol rich purified extract from olive mill wastewater  
462 on colon cancer cells. *Journal of Functional Foods* **2016**, *27*, 236-248, doi:10.1016/j.jff.2016.09.009.
- 463 32. Zhang, J.; Lei, W.; Chen, X.; Wang, S.; Qian, W. Oxidative stress response induced by chemotherapy  
464 in leukemia treatment. *Mol Clin Oncol* **2018**, *8*, 391-399, doi:10.3892/mco.2018.1549.
- 465 33. Kaiserova, H.; Simunek, T.; van der Vijgh, W.J.; Bast, A.; Kvasnickova, E. Flavonoids as protectors  
466 against doxorubicin cardiotoxicity: role of iron chelation, antioxidant activity and inhibition of  
467 carbonyl reductase. *Biochim Biophys Acta* **2007**, *1772*, 1065-1074, doi:10.1016/j.bbadis.2007.05.002.
- 468 34. Vincent, D.T.; Ibrahim, Y.F.; Espey, M.G.; Suzuki, Y.J. The role of antioxidants in the era of  
469 cardiooncology. *Cancer Chemother Pharmacol* **2013**, *72*, 1157-1168, doi:10.1007/s00280-013-2260-4.
- 470 35. Baranowska, M.; Bartoszek, A. Antioxidant and antimicrobial properties of bioactive phytochemicals  
471 from cranberry. *Postepy Hig Med Dosw (Online)* **2016**, *70*, 1460-1468, doi:10.5604/17322693.1227896.
- 472 36. Krajka-Kuzniak, V.; Szaefer, H.; Ignatowicz, E.; Adamska, T.; Oszmianski, J.; Baer-Dubowska, W.  
473 Effect of Chokeberry (*Aronia melanocarpa*) juice on the metabolic activation and detoxication of  
474 carcinogenic N-nitrosodiethylamine in rat liver. *J Agric Food Chem* **2009**, *57*, 5071-5077,  
475 doi:10.1021/jf803973y.
- 476 37. Polk, A.; Vaage-Nilsen, M.; Vistisen, K.; Nielsen, D.L. Cardiotoxicity in cancer patients treated with 5-  
477 fluorouracil or capecitabine: a systematic review of incidence, manifestations and predisposing  
478 factors. *Cancer treatment reviews* **2013**, *39*, 974-984, doi:10.1016/j.ctrv.2013.03.005.
- 479 38. Sara, J.D.; Kaur, J.; Khodadadi, R.; Rehman, M.; Lobo, R.; Chakrabarti, S.; Herrmann, J.; Lerman, A.;  
480 Grothey, A. 5-fluorouracil and cardiotoxicity: a review. *Ther Adv Med Oncol* **2018**, *10*,  
481 1758835918780140, doi:10.1177/1758835918780140.
- 482 39. Altena, R.; de Haas, E.C.; Nuver, J.; Brouwer, C.A.; van den Berg, M.P.; Smit, A.J.; Postma, A.; Sleijfer,  
483 D.T.; Gietema, J.A. Evaluation of sub-acute changes in cardiac function after cisplatin-based  
484 combination chemotherapy for testicular cancer. *Br J Cancer* **2009**, *100*, 1861-1866,  
485 doi:10.1038/sj.bjc.6605095.
- 486 40. Demkow, U.; Stelmaszczyk-Emmel, A. Cardiotoxicity of cisplatin-based chemotherapy in advanced  
487 non-small cell lung cancer patients. *Respir Physiol Neurobiol* **2013**, *187*, 64-67,  
488 doi:10.1016/j.resp.2013.03.013.
- 489 41. Dugbartey, G.J.; Peppone, L.J.; de Graaf, I.A. An integrative view of cisplatin-induced renal and  
490 cardiac toxicities: Molecular mechanisms, current treatment challenges and potential protective  
491 measures. *Toxicology* **2016**, *371*, 58-66, doi:10.1016/j.tox.2016.10.001.
- 492 42. El-Awady el, S.E.; Moustafa, Y.M.; Abo-Elmatty, D.M.; Radwan, A. Cisplatin-induced cardiotoxicity:  
493 Mechanisms and cardioprotective strategies. *Eur J Pharmacol* **2011**, *650*, 335-341,  
494 doi:10.1016/j.ejphar.2010.09.085.
- 495 43. Brown, D.A.; Perry, J.B.; Allen, M.E.; Sabbah, H.N.; Stauffer, B.L.; Shaikh, S.R.; Cleland, J.G.; Colucci,  
496 W.S.; Butler, J.; Voors, A.A., et al. Expert consensus document: Mitochondrial function as a  
497 therapeutic target in heart failure. *Nat Rev Cardiol* **2017**, *14*, 238-250, doi:10.1038/nrcardio.2016.203.
- 498 44. Varga, Z.V.; Ferdinandy, P.; Liaudet, L.; Pacher, P. Drug-induced mitochondrial dysfunction and  
499 cardiotoxicity. *Am J Physiol Heart Circ Physiol* **2015**, *309*, H1453-1467, doi:10.1152/ajpheart.00554.2015.

- 500 45. Gogvadze, V.; Orrenius, S.; Zhivotovsky, B. Mitochondria as targets for cancer chemotherapy. *Semin*  
501 *Cancer Biol* **2009**, *19*, 57-66, doi:10.1016/j.semcancer.2008.11.007.
- 502 46. Gorini, S.; De Angelis, A.; Berrino, L.; Malara, N.; Rosano, G.; Ferraro, E. Chemotherapeutic Drugs  
503 and Mitochondrial Dysfunction: Focus on Doxorubicin, Trastuzumab, and Sunitinib. *Oxid Med Cell*  
504 *Longev* **2018**, *2018*, 7582730, doi:10.1155/2018/7582730.
- 505 47. Beffagna, G. Zebrafish as a Smart Model to Understand Regeneration After Heart Injury: How Fish  
506 Could Help Humans. *Front Cardiovasc Med* **2019**, *6*, 107, doi:10.3389/fcvm.2019.00107.
- 507 48. Bournele, D.; Beis, D. Zebrafish models of cardiovascular disease. *Heart Fail Rev* **2016**, *21*, 803-813,  
508 doi:10.1007/s10741-016-9579-y.
- 509 49. Liu, J.; Stainier, D.Y. Zebrafish in the study of early cardiac development. *Circ Res* **2012**, *110*, 870-874,  
510 doi:10.1161/CIRCRESAHA.111.246504.
- 511
- 512
